# Supplementary material for: Preparation of Thermo-Responsive Poly(ionic liquid)s-Based Nanogels via One-Step Cross-Linking Copolymerization
Source: PubMed Central journal article supplement (PMC6332038; doi:10.3390/molecules200917378), 2015-09-18
Supplement: molecules-20-17378-s001.pdf [file molecules-20-17378-s001.pdf]

# Supplementary Materials

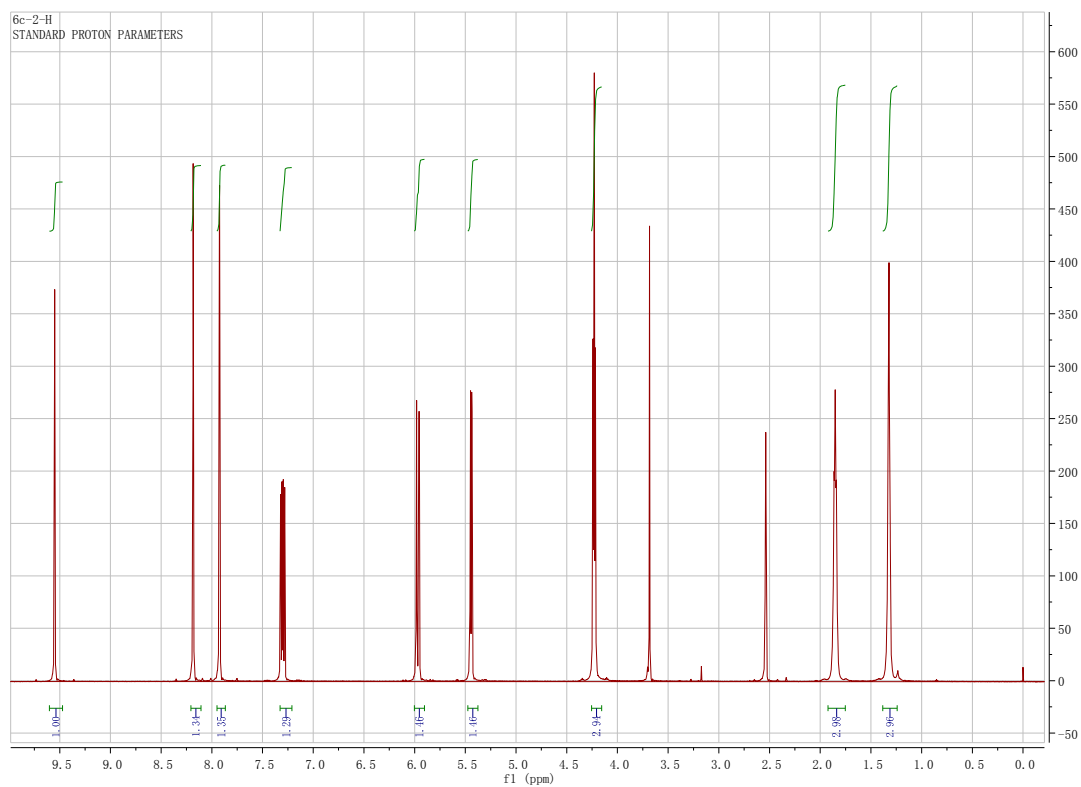

**Figure S1.** <sup>1</sup>H-NMR of [C<sub>6</sub>VIm]Br in deuterium solvents. (DMSO-*d*<sub>6</sub> + 0.05 mL D<sub>2</sub>O, immediately)

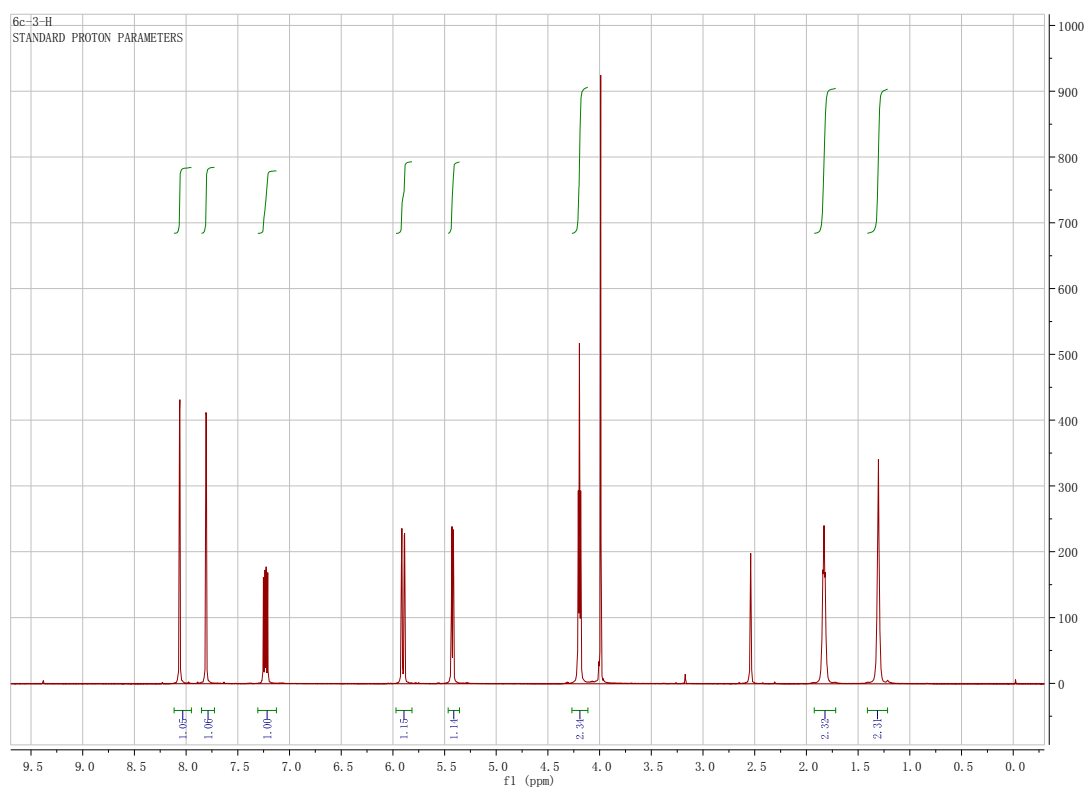

**Figure S2.** <sup>1</sup>H-NMR of [C<sub>6</sub>VIm]Br in deuterium solvents. (0.6 mL DMSO-*d*<sub>6</sub> + 0.1 mL D<sub>2</sub>O, 30 min later)

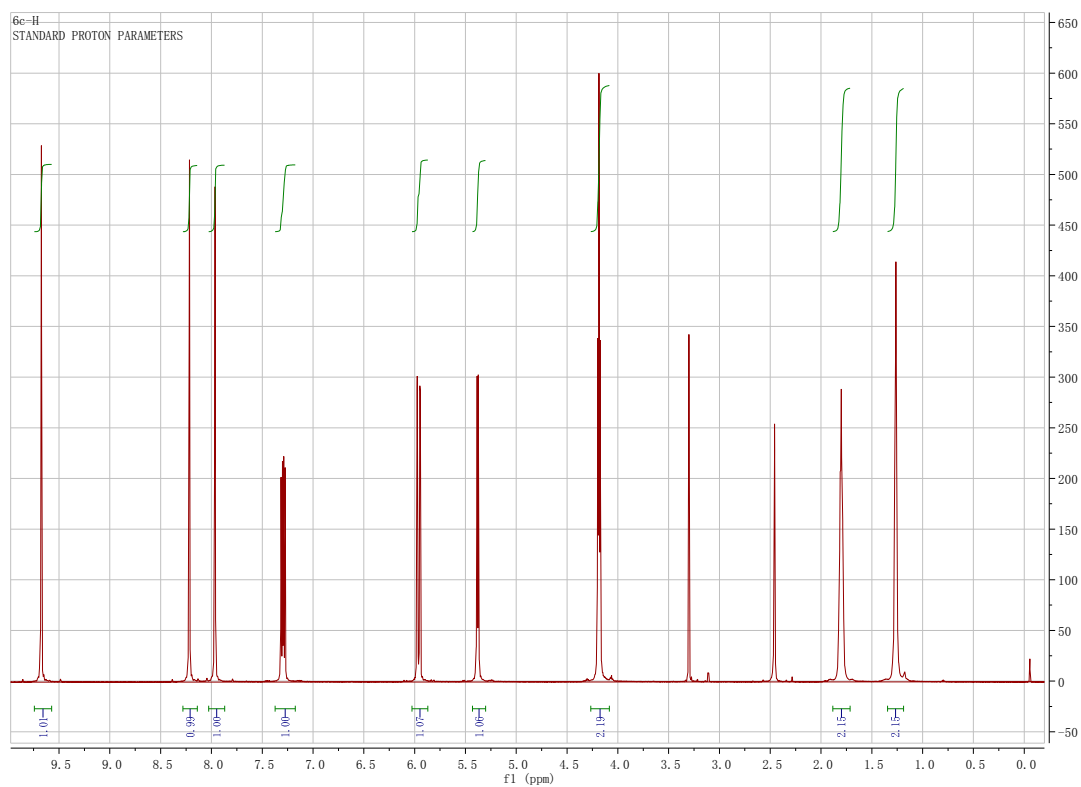

**Figure S3.** <sup>1</sup>H-NMR of [C<sub>6</sub>VIm]Br in deuterium solvents. (0.6 mL DMSO-*d*<sub>6</sub>).

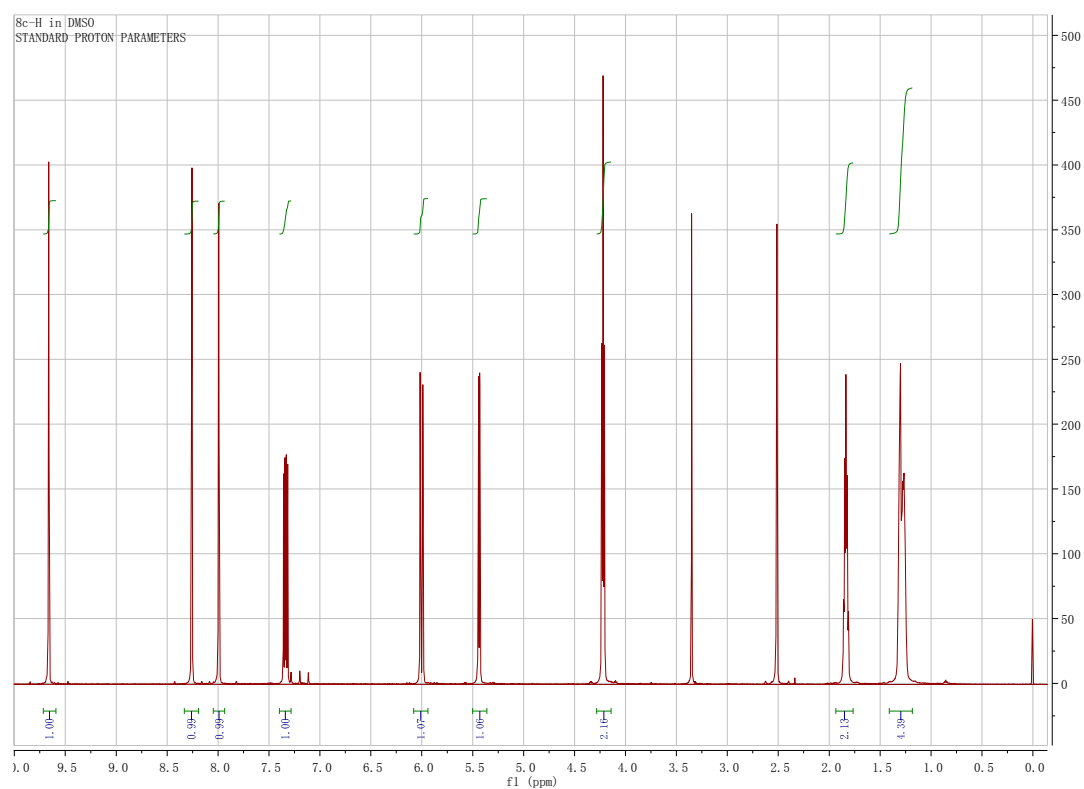

**Figure S4.** <sup>1</sup>H-NMR of [C<sub>8</sub>VIm]Br in DMSO-*d*<sub>6</sub>.

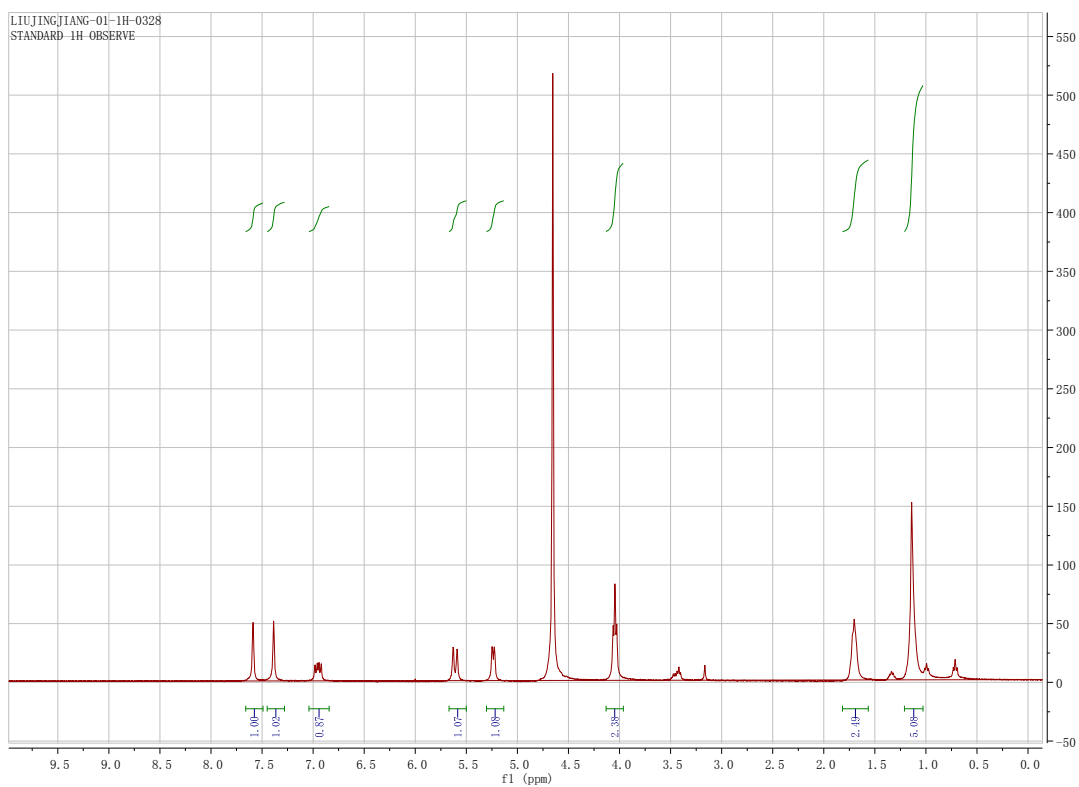

Figure S5.  $^1\text{H-NMR}$  of  $[\text{C}_8\text{VIm}]\text{Br}$  in  $\text{D}_2\text{O}$ .

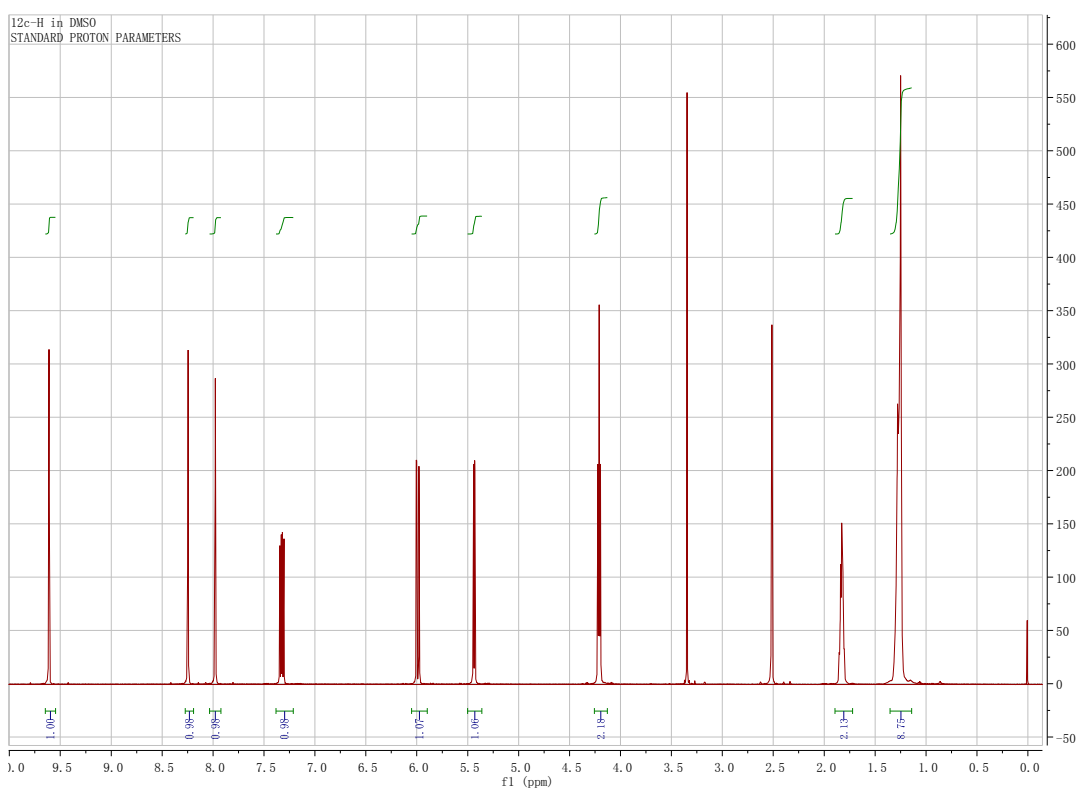

Figure S6.  $^1\text{H-NMR}$  of  $[\text{C}_{12}\text{VIm}]\text{Br}$  in  $\text{DMSO-}d_6$ .

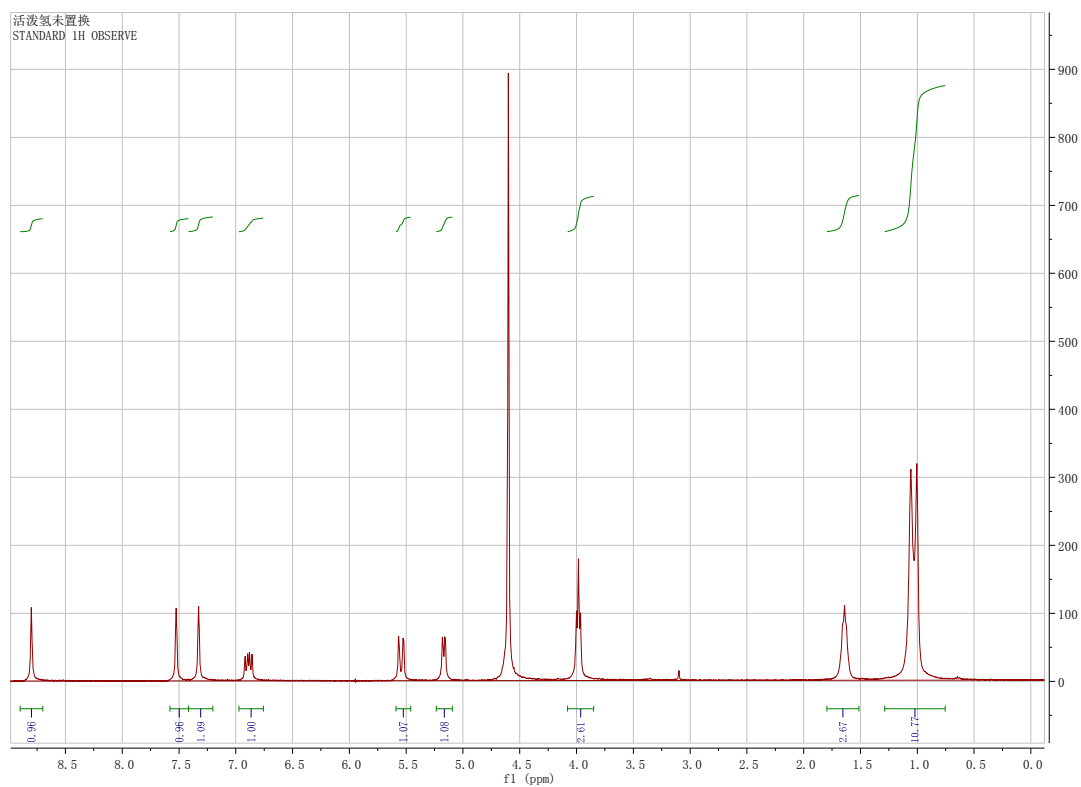

**Figure S7.**  $^1\text{H-NMR}$  of  $[\text{C}_{12}\text{VIm}]\text{Br}$  in  $\text{D}_2\text{O}$  (immediately).

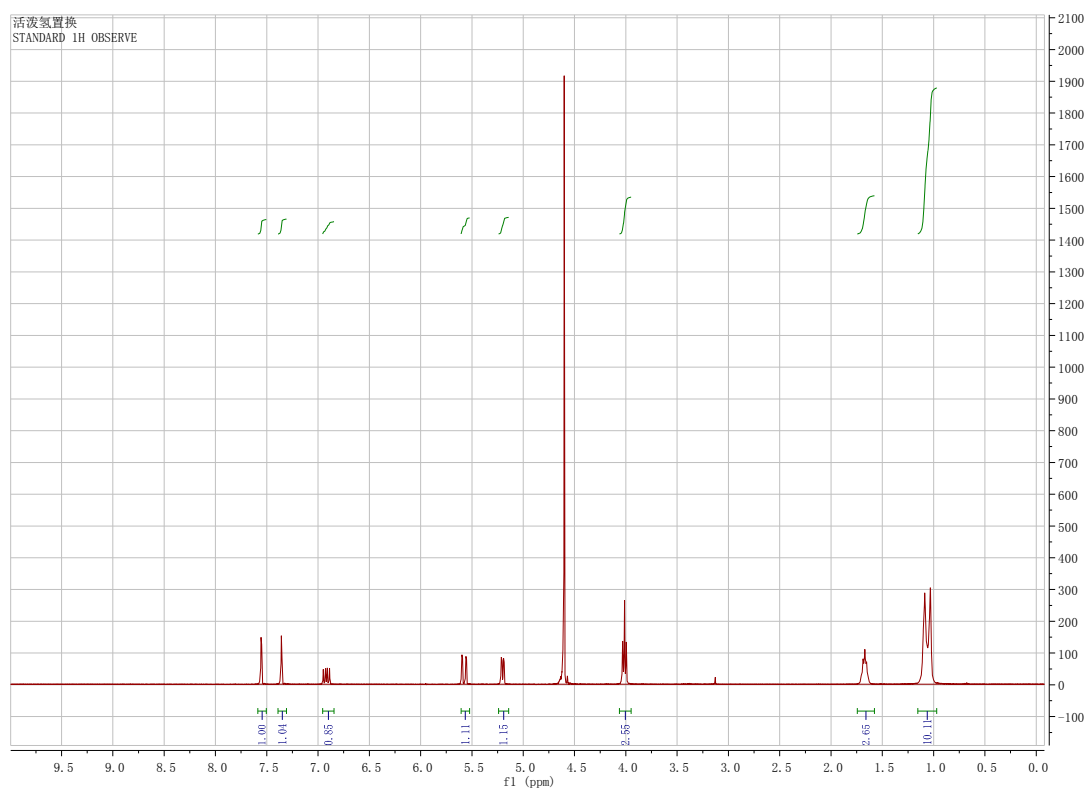

**Figure S8.**  $^1\text{H-NMR}$  of  $[\text{C}_{12}\text{VIm}]\text{Br}$  in  $\text{D}_2\text{O}$  (30 min later).
